# Supplementary material
Source: PubMed Central journal article supplement (PMC4775947)
Supplement: AAC.01868-15_zac003164951so1.pdf [file AAC.01868-15_zac003164951so1.pdf]

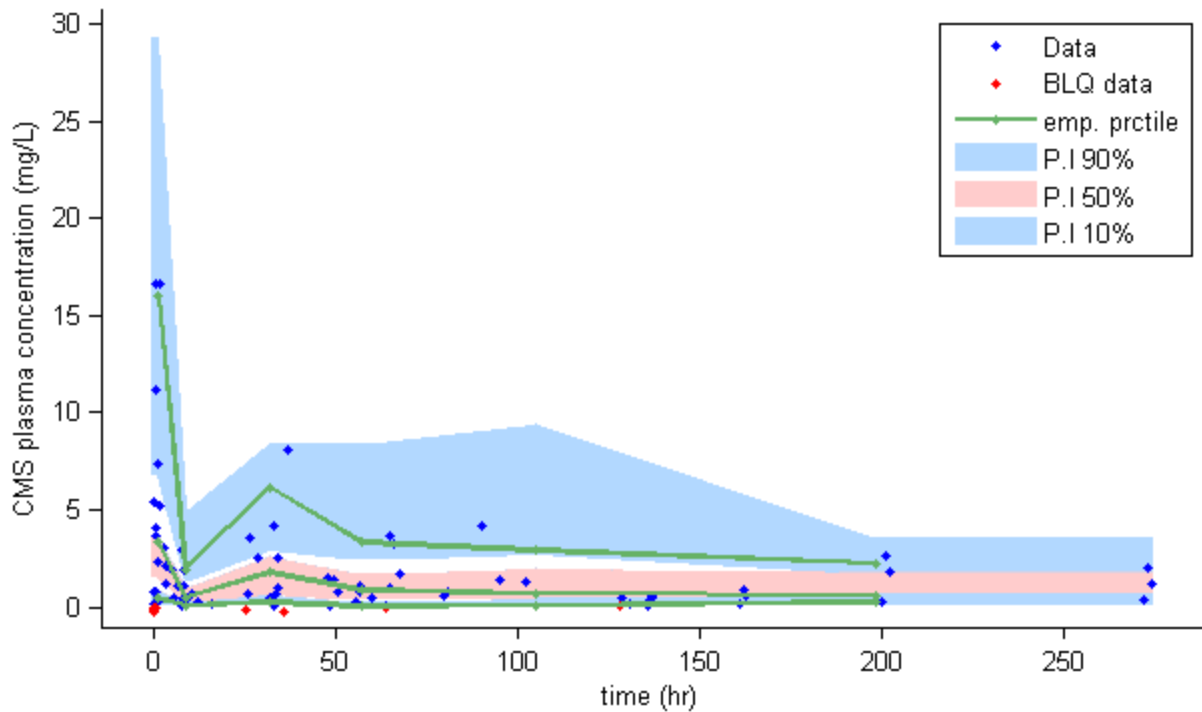

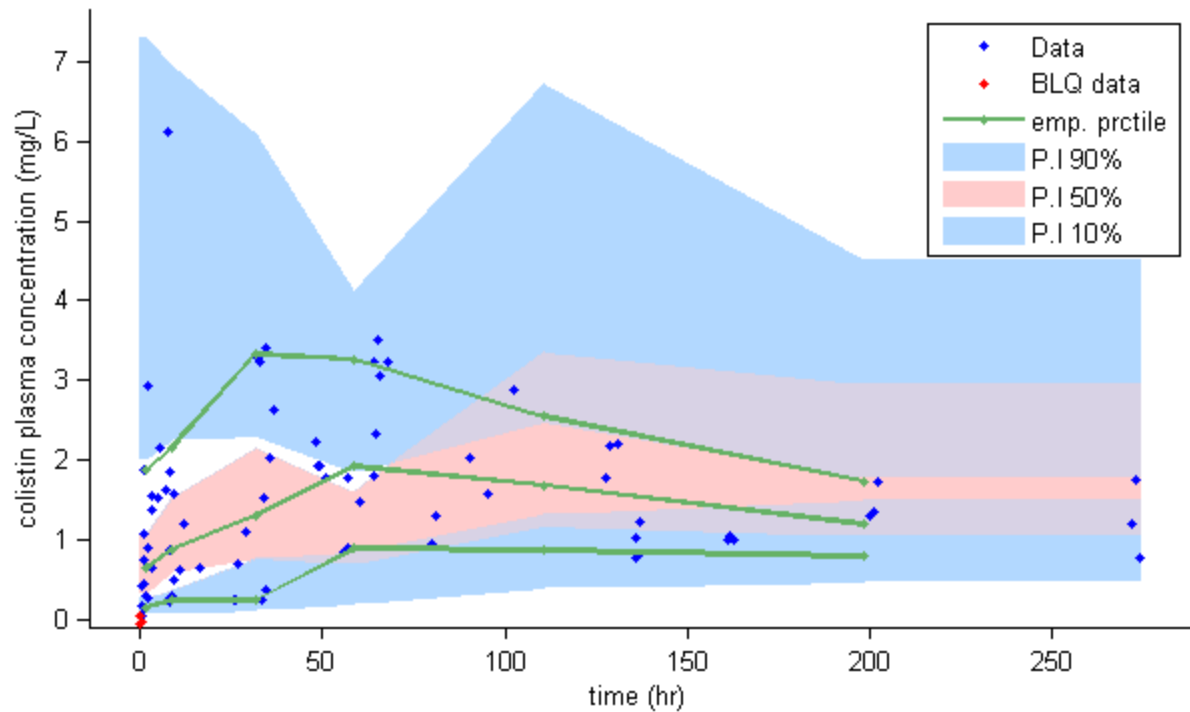

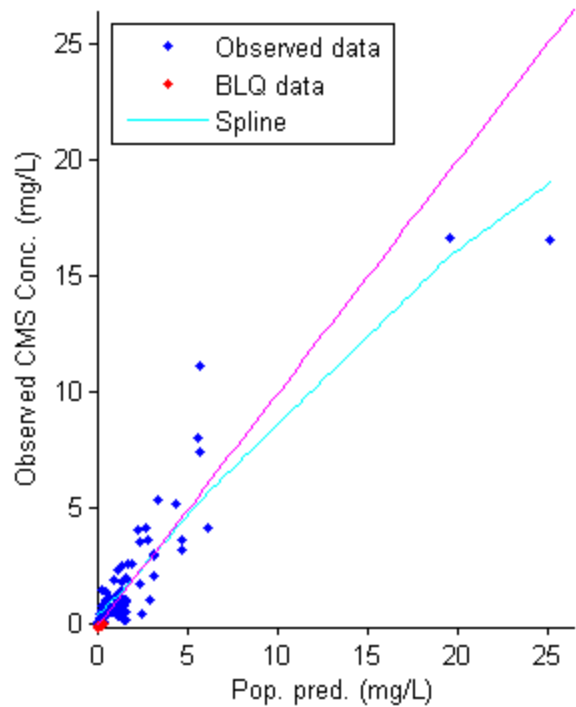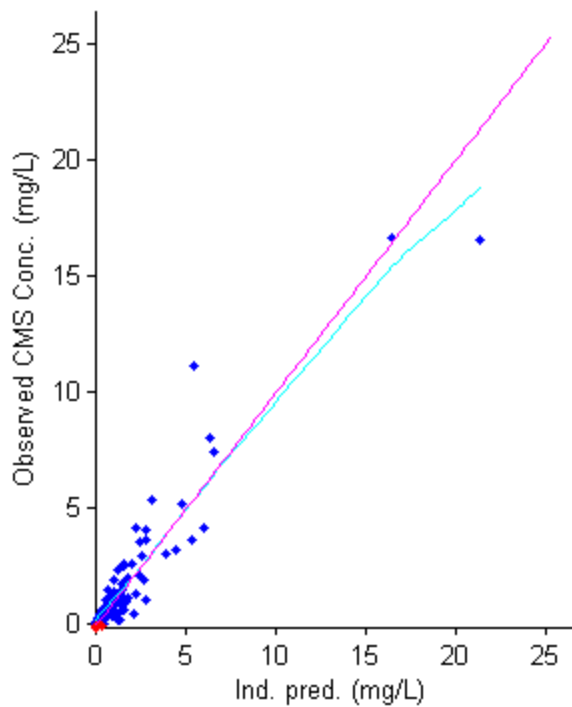

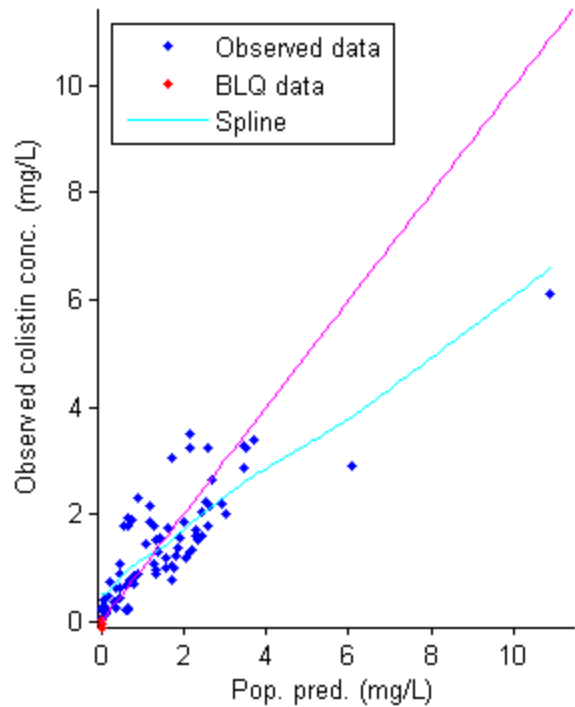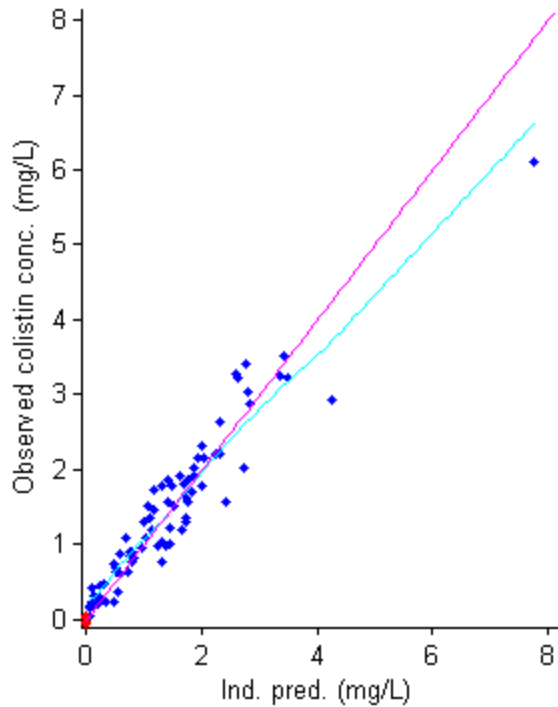

DESCRIPTION:

PK model for CMS (YTYPE=1) 1 cpt, colistine (YTYPE=2) 1 cpt, with aerosol, with hemodialysis

INPUT:

parameter={Faero,CLincms,CLoutcms,CLincol,CLoutcol,CLbiotrans,Vbal,Vcms,CLnrcms,CLcol,Vcol,CLHDcms,CLHDcol}  
regressor={collect,seance}

PK:

compartment(cmt=1,amount=Qcms)  
compartment(cmt=2,amount=Acms)  
compartment(cmt=3,amount=Acol)  
compartment(cmt=4,amount=Qcol)

iv(adm=1, cmt=1)  
iv(adm=2, cmt=2, p=Faero)

EQUATION:

pcol=1166.8 ; masse mol colistine  
pcms=1631.97 ; masse mol CMS  
rlm=pcol/pcms

ddt\_Acms = -(CLbiotrans+CLoutcms)\*Acms/Vbal + CLincms\*Qcms/Vcms  
ddt\_Acol = -CLoutcol\*Acol/Vbal+CLbiotrans\*Acms/Vbal\*rlm + CLincol\*Qcol/Vcol

ddt\_Qcms = -(CLincms+CLnrcms+CLHDcms\*seance)\*Qcms/Vcms + CLoutcms\*Acms\*Vbal  
ddt\_Qcol = -(CLincol+CLcol+CLHDcol\*seance)\*Qcol/Vcol +  
CLnrcms\*rlm\*Qcms/Vcms+CLoutcol\*Acol/Vbal

Ccms = Qcms/Vcms  
Ccol = Qcol/Vcol

ddt\_AUCcms=Ccms  
ddt\_AUCcol=Ccol

OUTPUT:

output = {Ccms,Ccol}  
table = {AUCcms, AUCcol}

Fig. S1. Visual predictive check of CMS plasma concentrations for the final model. Dots represent the observed data (red for concentrations below the limit of quantification) and lines represent the 10th, 50th and 90th percentiles of the observed data. The shaded areas are the 95% CI of the 10th, 50th and 90th percentiles for the final model.

Fig. S2. Visual predictive check of colistin plasma concentrations for the final model. Dots represent the observed data (red for concentrations below the limit of quantification) and lines represent the 10th, 50th and 90th percentiles of the observed data. The shaded areas are the 95% CI of the 10th, 50th and 90th percentiles for the final model.

Fig. S3. Observed data *versus* population (left) and individual (right) predictions of CMS concentrations.

Fig. S4. Observed data *versus* population (left) and individual (right) predictions of colistin concentrations.

Doc. S1. Control stream for the final model in Monolix software
